# Supplementary material for: An adversarial collaboration to critically evaluate theories of consciousness
Source: Research Square preprint supplement (doi:10.21203/rs.3.rs-3101836/v1), 2023-06-28

**a** fMRI univariate conjunction maps showing areas sensitive to task goals and task relevance

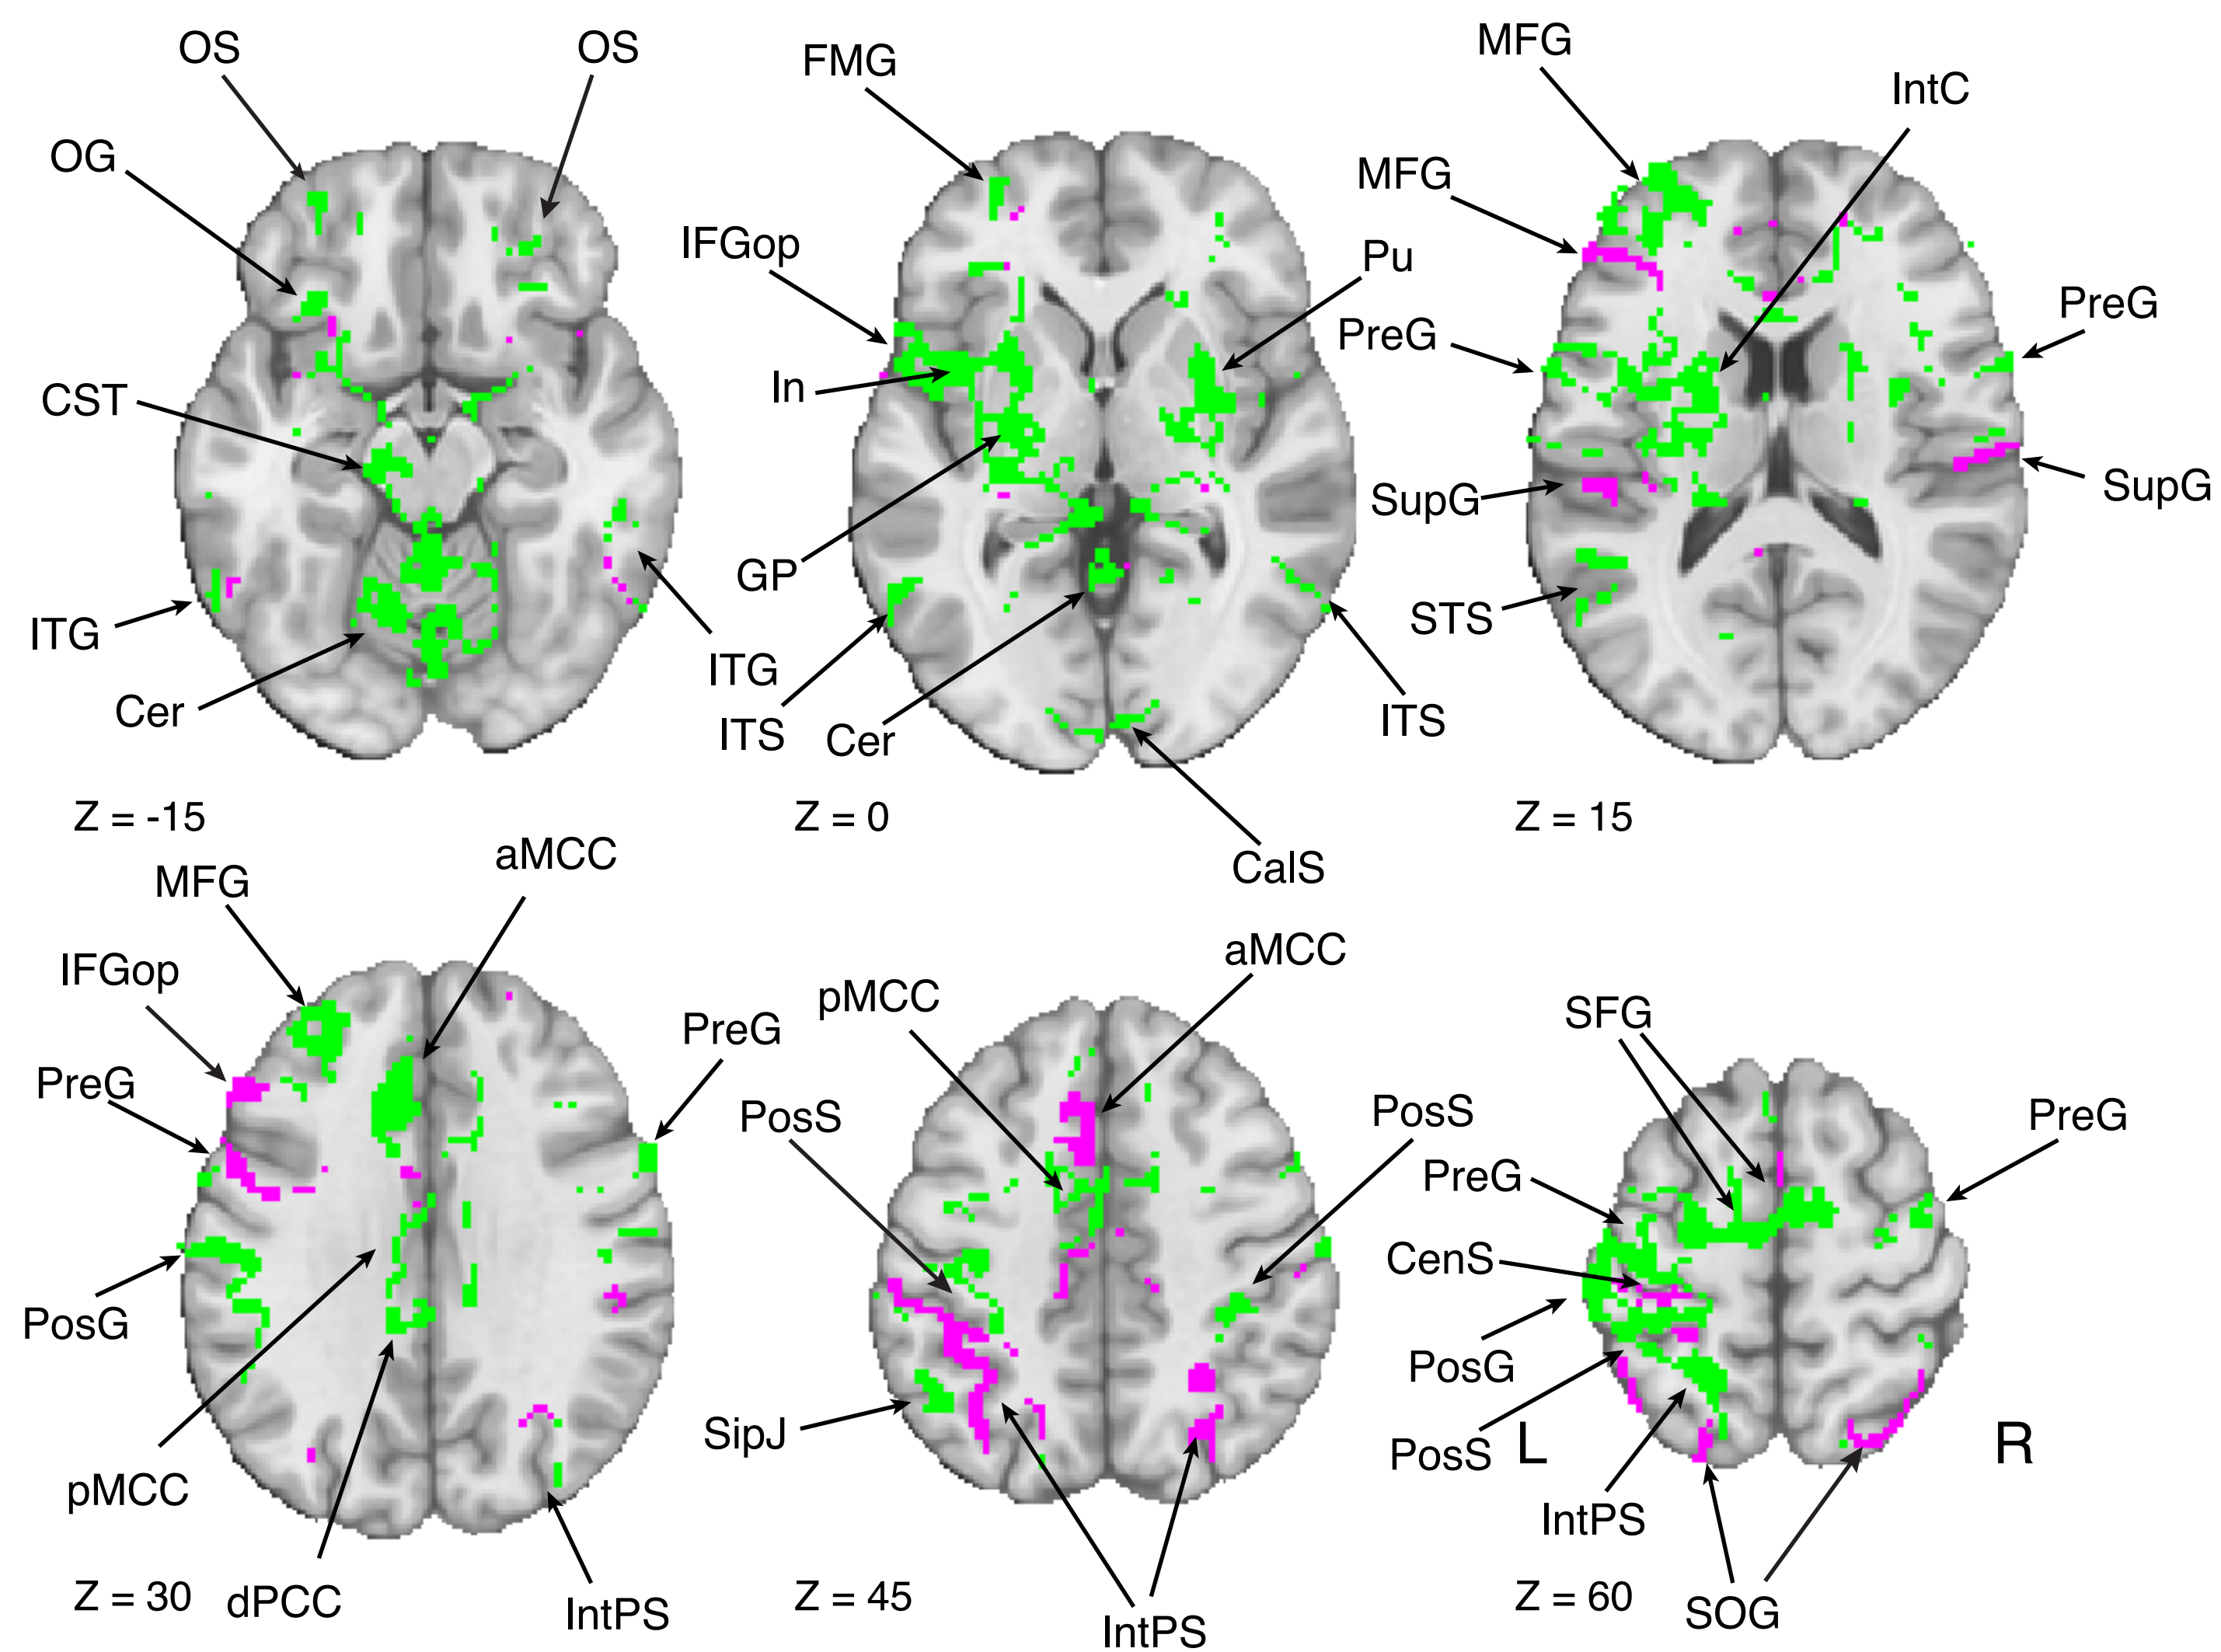

**b** fMRI multivariate conjunction maps showing putative NCC areas

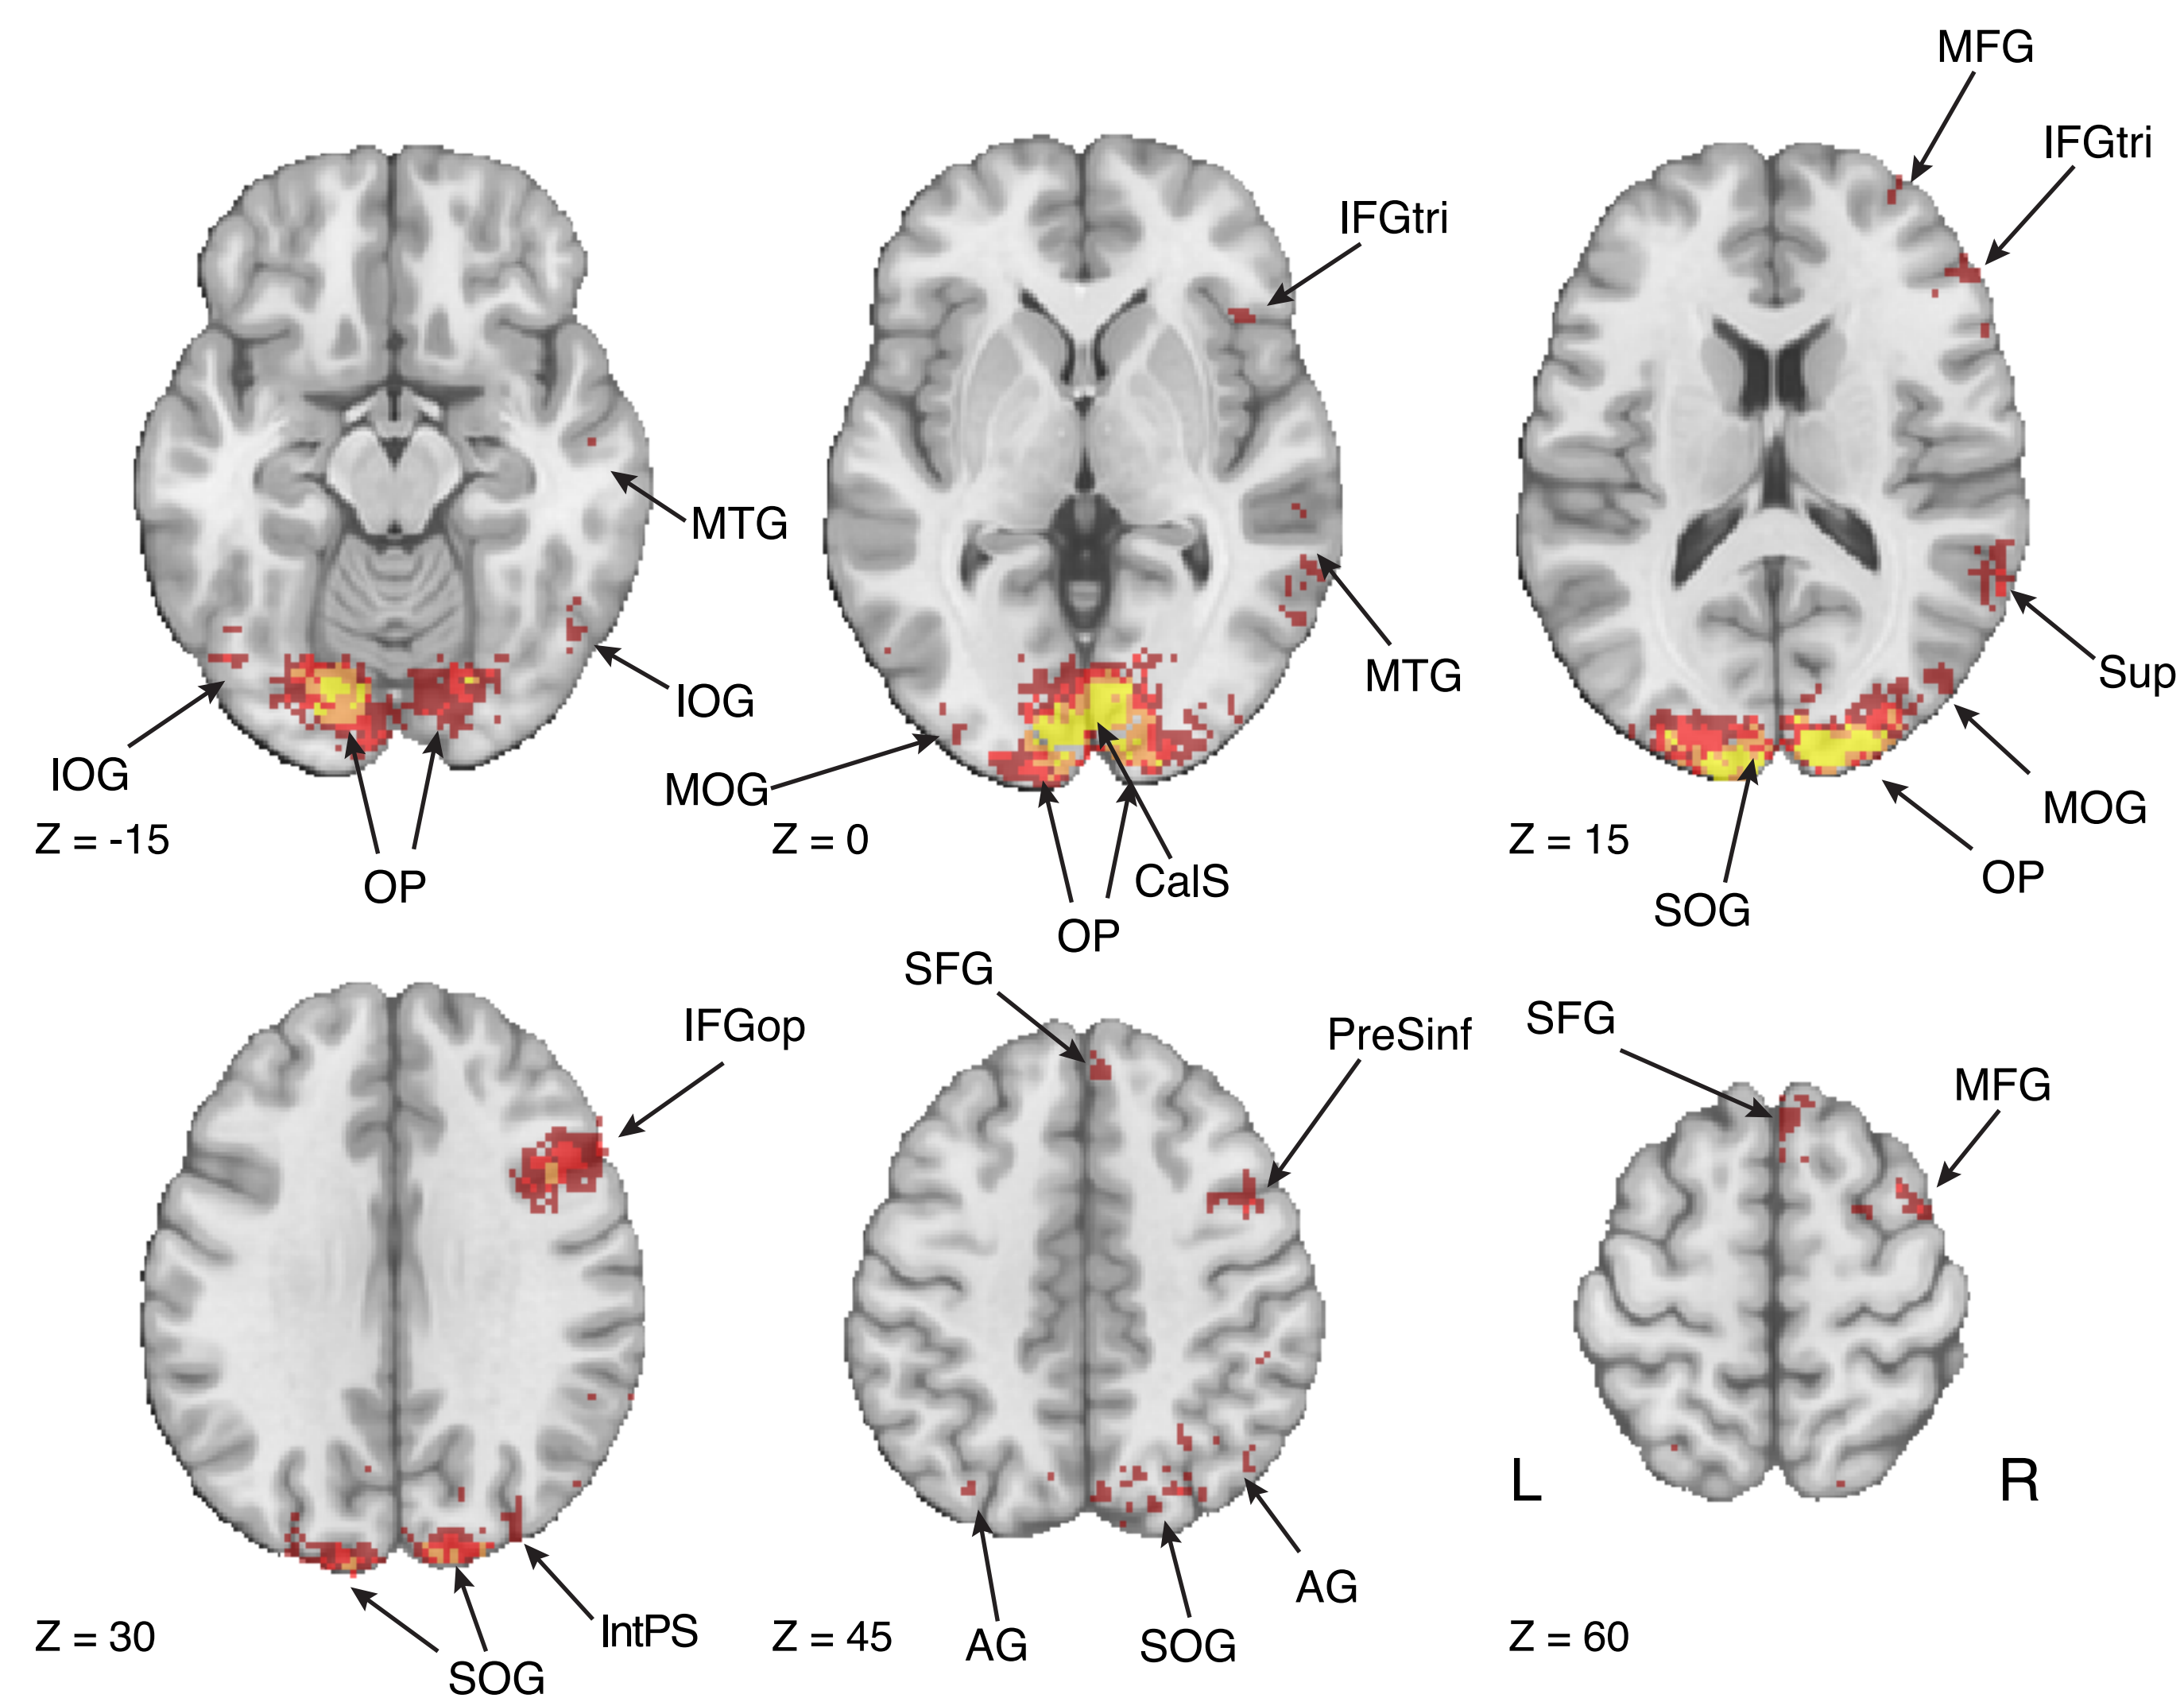

Supplement: Supplementary file 1 [file 223397ca7ef2633db845e801.pdf]
