# Supplementary figures and images for: An adversarial collaboration to critically evaluate theories of consciousness
Source: Research Square preprint supplement (doi:10.21203/rs.3.rs-3101836/v1), 2023-06-28

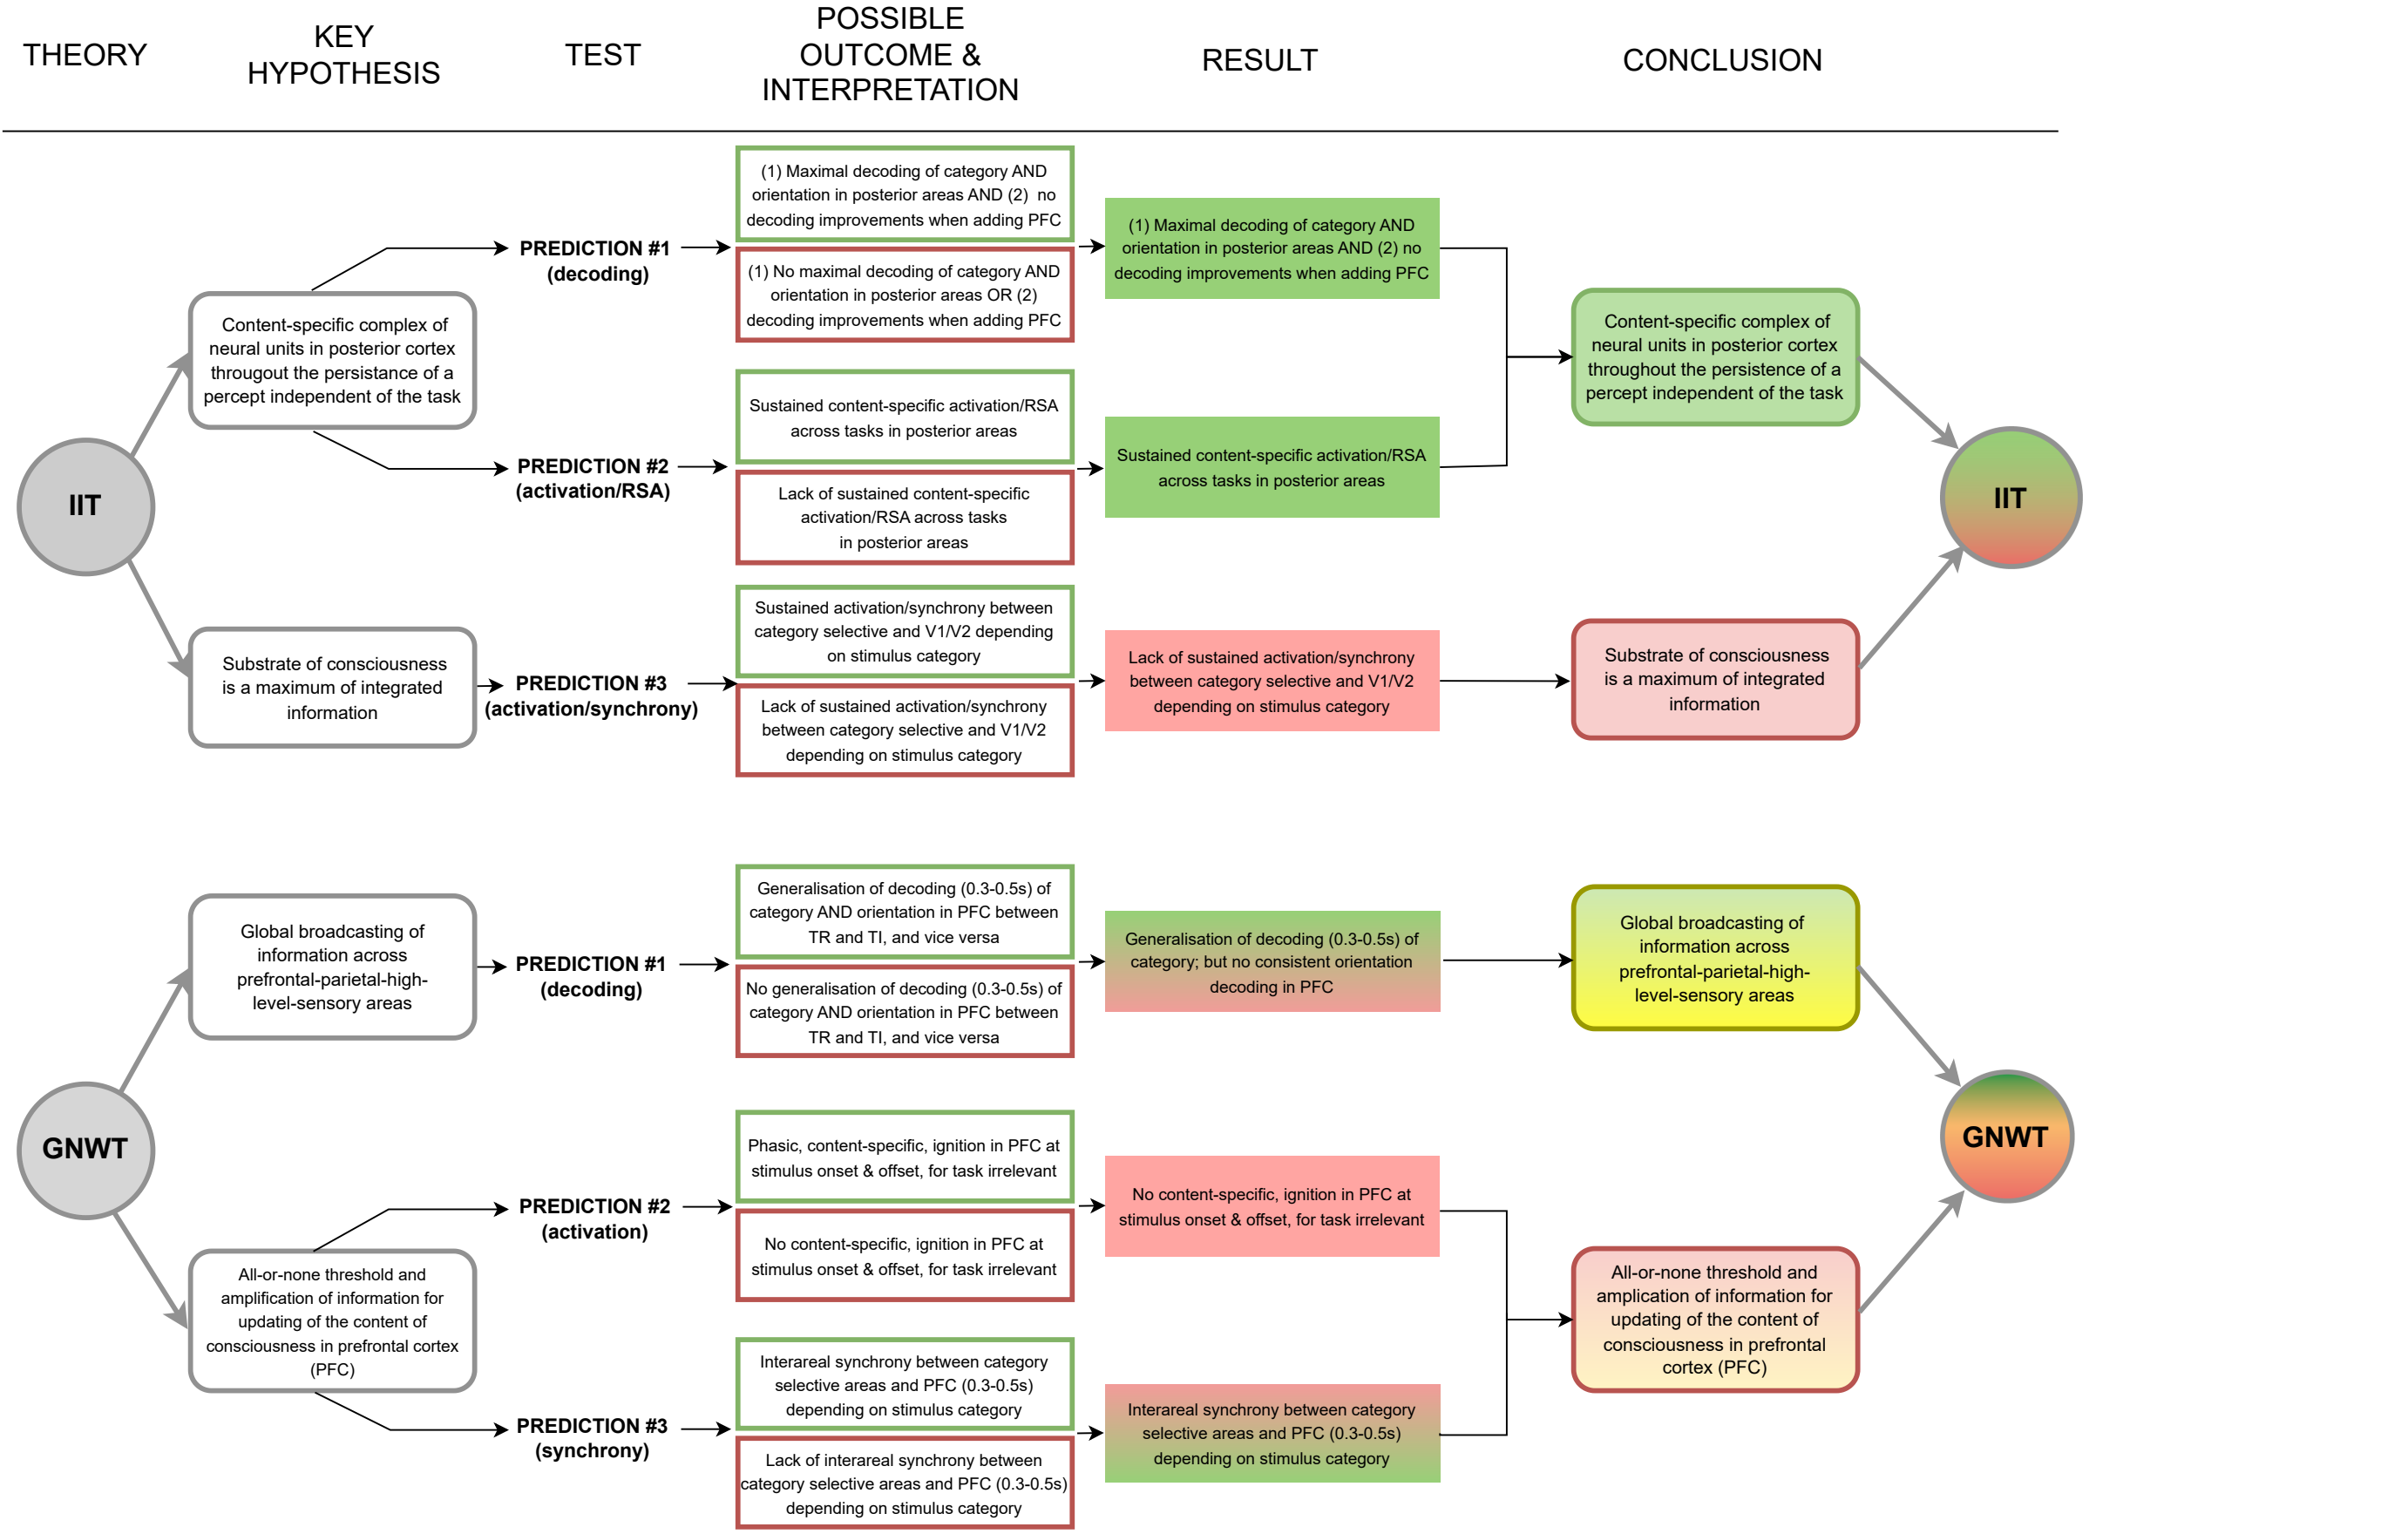

Supplement: Supplementary file 2 [file 618b4b81526eee09ce7e50c5.pdf]
